# Supplementary material
Source: PubMed Central journal article supplement (PMC4496621)
Supplement: IAI.00315-15_zii999091315so1.pdf [file IAI.00315-15_zii999091315so1.pdf]

## SUPPLEMENTARY MATERIAL

**Table S1. *Borrelia burgdorferi* strains and oligonucleotide primers used in this study**

| A. <i>Borrelia burgdorferi</i> strains           |                                                                                                     |                           |                                    |                |            |
|--------------------------------------------------|-----------------------------------------------------------------------------------------------------|---------------------------|------------------------------------|----------------|------------|
| Strain                                           |                                                                                                     | Description               | Antibiotic Resistance <sup>1</sup> | Reference      |            |
| CE162                                            | Wild-type strain 297                                                                                |                           |                                    | (20)           |            |
| Bb914                                            | CE162 with P <sub>flaB</sub> -gfp reporter stably-inserted into cp26                                |                           | Gent                               | (6)            |            |
| Bb1399                                           | Wild-type B31 5A4 NP1 containing insertion of P <sub>flgB</sub> -Kan <sup>R</sup> cassette in bbe02 |                           | Kan                                | (40)           |            |
| Bb1197                                           | Δhk1 (bb0420) mutant in B31 5A4 NP1 background                                                      |                           | Kan/Strep                          | (34)           |            |
| Bb1451                                           | Δrrp1 (bb0419) mutant in B31 5A4 NP1 background                                                     |                           | Kan/Strep                          | (35)           |            |
| Bb1452                                           | Δglp (bb0240-0243) null mutant in B31 5A4 NP1 background                                            |                           | Kan/Gent                           | (35)           |            |
| Bb1286                                           | B31 5A4 NP1 containing insertion of P <sub>flaB</sub> -gfp reporter into cp26                       |                           | Kan/Gent                           | (42)           |            |
| Bb1520                                           | Δrrp1 (bb0419) mutant in Bb1286 background                                                          |                           | Kan/Gent/Strep                     | This Study     |            |
| Bb1548                                           | ΔplzA (bb0733) mutant in Bb1286 background                                                          |                           | Kan/Gent/Strep                     | This Study     |            |
| B. Oligonucleotide primers used in these studies |                                                                                                     |                           |                                    |                |            |
| Primer                                           | Forward (5'-3')                                                                                     |                           | Reverse (5'-3')                    | Purpose        | Reference  |
| flaB                                             | CTTTTCTCTGGTGAGGGAGCTC                                                                              | GCTCCTTCCTGTTGAACACCC     |                                    | qPCR & qRT-PCR | (136)      |
| flaB-Probe                                       | FAM-CTTGAACCGGTGCAGCCTGAGCA-BHQ1                                                                    |                           |                                    | qPCR & qRT-PCR | (136)      |
| bb0021                                           | AGAGGATCTTCAAGGTTAATCGTG                                                                            | ACGCAGTGAATAAATTAGTGTC    | AA                                 | qRT-PCR        | (24)       |
| malX-1/bb0116                                    | TTTATCTATCTATTATGTTTGGACTGCC                                                                        | GCCCCAGAGAAAAGAAGTGC      |                                    | qRT-PCR        | This Study |
| bb0240                                           | AAGTCCCGAATACCAGGAGAAAT                                                                             | TTCTTGCTGCTGTGTAAATACCAAA |                                    | qRT-PCR        | (19)       |
| bb0241                                           | CCTTAAAAAGGGTATGGCCAA                                                                               | CTTGTCGTGGCTAATGATTG      |                                    | qRT-PCR        | This Study |
| bb0243                                           | GCTCTGTTCTATATTACGATGATT                                                                            | AGGGCAATGCCTCCTTTTT       |                                    | qRT-PCR        | This Study |
| bb0323                                           | ATATGGATCCCGCTGGAAAT                                                                                | AGCCGCTTCAAGTGCTTTTA      |                                    | qRT-PCR        | This Study |

|                               |                             |                                  |         |            |
|-------------------------------|-----------------------------|----------------------------------|---------|------------|
| <i>bb0629</i>                 | TGTAGTCTCAGGAGGAAT          | AATATAGCCAGCAAGTATTG             | qRT-PCR | This Study |
| <i>bosR/bb0647</i>            | GTCCACCCTATTCAACTT          | TTCCTTGTCTCATCTGG                | qRT-PCR | This Study |
| <i>mcp4/bb0680</i>            | GGTCTAAACAAAGCGAAAAAAGG     | GAATCTAAATCTATCAAACTATCTGCCAC    | qRT-PCR | (24)       |
| <i>cdr/bb0728</i>             | GACGCTGTTATACTTGCTACCG      | GAAGCTGAGCCCAATGTGCCT            | qRT-PCR | (24)       |
| <i>rpoS/bb0771</i>            | CTTGCAGGACAAATACAAAGAGGC    | GCAGCTCTTATTAATCCCAAGTTGCC       | qRT-PCR | (24)       |
| <i>spoVG/bb0785</i>           | TGGATATTACAGACATAAGGATT     | CTGTTAGGCATCGCAATA               | qRT-PCR | This Study |
| <i>arcA/bb0841</i>            | TTTGGCGATAGCTCCAGGAGAAGT    | ATAGACATGCATCTTGGCCCACCA         | qRT-PCR | This Study |
| <i>bba07</i>                  | TAGCAATCCCGACAAGTTTAAT      | AGAGCCATTTTAGCCTTTCTTT           | qRT-PCR | (24)       |
| <i>ospA/bba15</i>             | CTGCAGCTTGGAATTCAGGC        | GTTTTGTAATTTCAACTGCTGAC          | qRT-PCR | (24)       |
| <i>dbpA/bba24</i>             | GGGTAGTGGGGTATCAGAAAATC     | GAGCTGTAGTTGGAGGATTCTC           | qRT-PCR | (24)       |
| <i>bba52</i>                  | TCAAAAACTCAAGACCTTCCAAAA    | AATTCACCTTCTGCACCGTTAAGAT        | qRT-PCR | This Study |
| <i>bba57</i>                  | CAGAAGAAGCAAATATGGCAA       | TCGTTGGTGGTTGTTGAA               | qRT-PCR | This Study |
| <i>bba59</i>                  | TTGGTCGTGGGATTTTAATAGATTCTA | TGAGGCTTTTGATTGTGGGTTT           | qRT-PCR | This Study |
| <i>lp6.6/bba62</i>            | GTTGCTTGCGAAACTACAAGA       | CATTGACTTTGTCATAGGTTGCTT         | qRT-PCR | (24)       |
| <i>bba73</i>                  | CGATAACATTATTGGCGAAT        | TCCAACCCTTATTACTC                | qRT-PCR | This Study |
| <i>bba74</i>                  | ACTATTAACAAGGTAACCGAAGATG   | CCTTGTTTGACCCCTCAGCAAC           | qRT-PCR | (24)       |
| <i>ospC/bbb19</i>             | AGGGAAAGGTGGAATACATC        | TGTTCCATTATGCCCCGC               | qRT-PCR | (24)       |
| <i>malX-2/bbb29</i>           | AAGCCAGGAATATACAAG          | GAAAGACAGCAACAAATC               | qRT-PCR | This Study |
| <i>bbh28</i>                  | ATTCGGAAGCCATTGATTACA       | CGCAACATTCAAGGCATTG              | qRT-PCR | This Study |
| <i>bbo39</i>                  | GAAAACTCAAGGCGACAGGTCTA     | GTTTGCTAATTCATCAGTATTGC          | qRT-PCR | This Study |
| <i>erpP/bbp38<sup>2</sup></i> | GCAATGGAGAGGTAAAGGTCAA      | GCTTTTATAAAGTTATTAATTTCTTCC      | qRT-PCR | This Study |
| <i>bbq47</i>                  | ATGGTATAGAAAGTCAAACAAGT     | CTTCGCCTTCTTCATCTTC              | qRT-PCR | This Study |
| <i>297 ospC</i>               | CAGGGAAAGATGGGAATACATCTGC   | CGCTTCAACCTCTTTCACAGCAAG         | qRT-PCR | This Study |
| <i>B31 ospE</i>               | AAAGCAATGGAGAGGTAAAGG       | GCTTTTATAAAGTTATTAATTTCTTCCTCTTC | qRT-PCR | (38)       |

<sup>1</sup>Antibiotic resistance determined by growing spirochetes in the presence of the following antibiotics: gentamycin (Gent; 50 µg/ml); erythromycin (Erm; 0.06 µg/ml), kanamycin (Kan; 400 µg/ml), and streptomycin (Strep; 50 µg/ml).

<sup>2</sup>The nucleotide sequences of *bbi39* and *bbp38* paralogs are essentially identical.

**Table S2. RNA-Seq analysis of wild-type and  $\Delta rrp1$  *B. burgdorferi* *in vitro*.**

<sup>1</sup>Annotations and gene product descriptions are based on RefSeq *B. burgdorferi* genome annotation and/or Spirochete Genome Browser ([sgb.fli-leibniz.de](http://sgb.fli-leibniz.de)). Some gene designations and descriptions have been updated based on published experimental data and/or database searches.

<sup>2</sup>Genomic coordinates for gene or transcripts based on NCBI RefSeq annotation.

<sup>3</sup>Results from differential gene expression testing, performed using RNA-Rocket, comparing the summed Fragments Per Kilobase per Million fragments mapped (FPKM) of transcripts for each gene\_id. OK indicates a successful test for differential gene expression. NOTEST indicates that there were not enough alignments in either sample for testing. Reads for highly conserved plasmid-encoded paralogous genes, particularly those encoded on cp32/lp56 plasmids, may have been excluded from the final dataset during mapping due to ambiguity in their genomic location.

<sup>4</sup>The log<sub>2</sub> of the fold change observed for wild-type compared to  $\Delta rrp1$  *Bb*.

<sup>5</sup>The False Discovery Rate (FDR)-adjusted *p*-value.

<sup>6</sup>Criteria used for establishing cellular location are described in Methods and Materials.

<sup>7</sup>Based on previously published oligonucleotide-based microarray analyses.

<sup>8</sup>Genes that are upregulated by RpoS (RpoS-UP) only *in vitro* (IV), only DMCs, both *in vitro* and DMCs (Both) or genes whose expression is repressed by RpoS within the mammalian host.

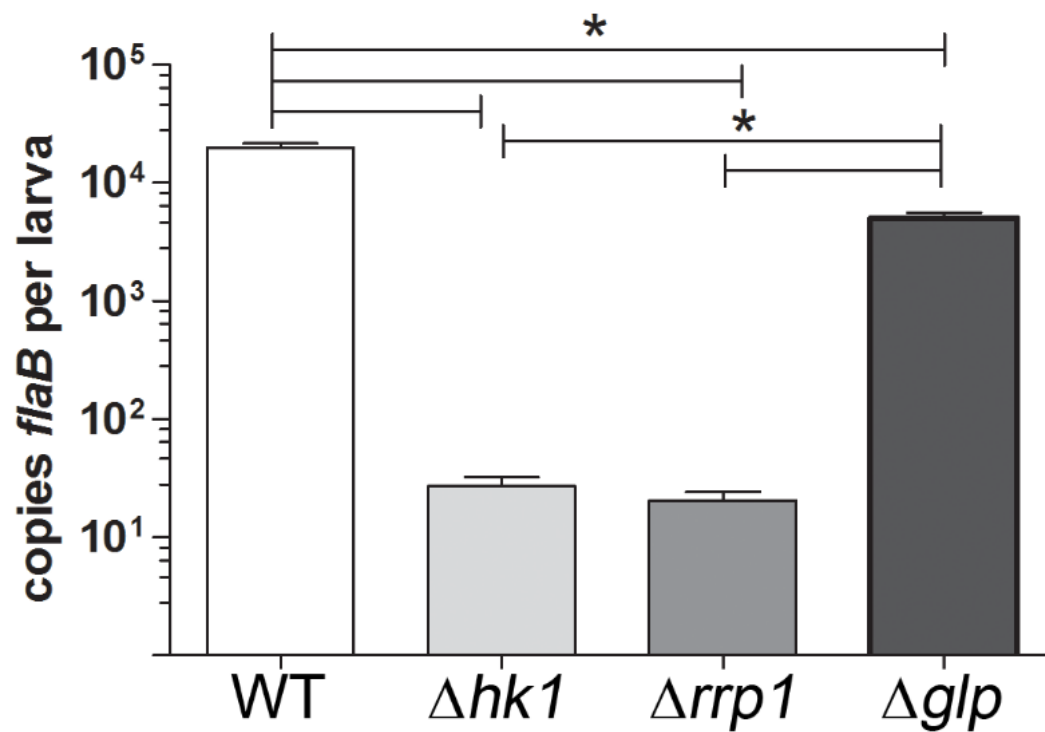

**Figure S1. Loss of *glp* gene expression alone cannot account for the survival defect of  $\Delta hk1$  and  $\Delta rrp1$  *Bb* during tick feeding.** Burdens were assessed by qPCR using a TaqMan assay for *flaB* normalized per larvae. Bars represent the mean  $\pm$  SEM for each isolate. Statistical significance was determined by comparing the average normalized *flaB* value for each mutant to that of the wild-type parent using an unpaired *t*-test. \*,  $p \leq 0.0001$ .

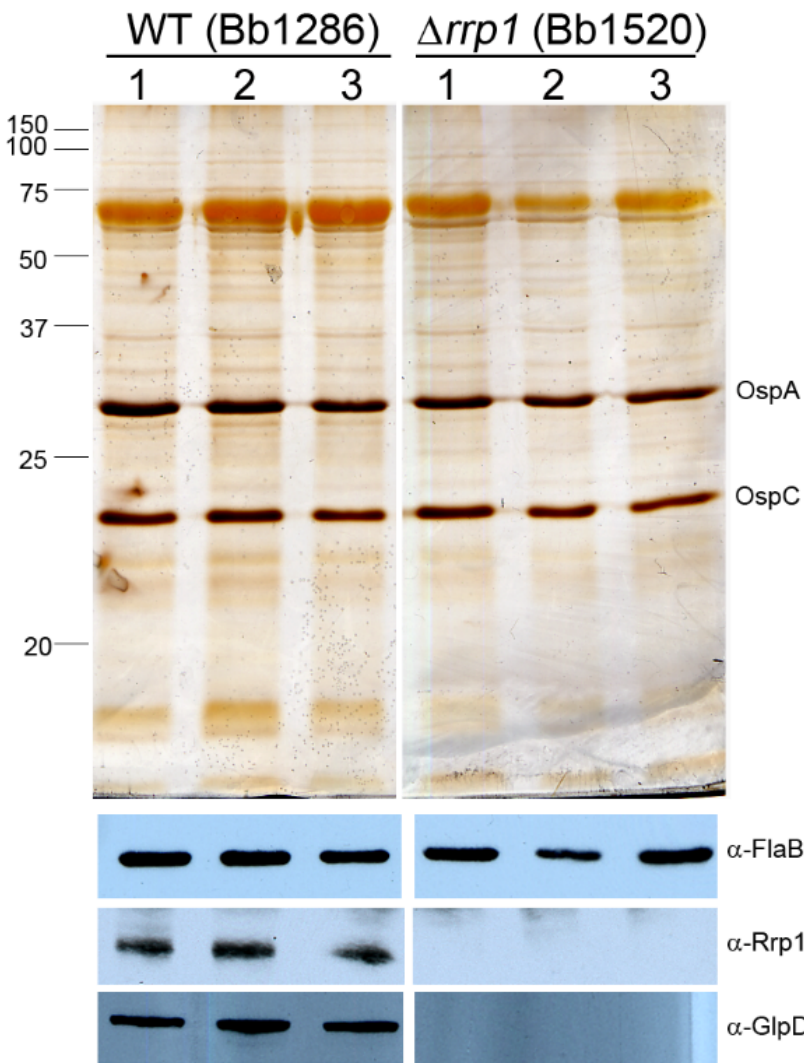

**Figure S2. Analysis of samples used for RNA-Seq analysis.** Whole-cell lysates from wild-type (Bb1286) and  $\Delta rrp1$  (Bb1520) *Bb* (3 biological replicates per isolate) grown to late-logarithmic phase *in vitro* following a temperature-shift from 23°C to 37°C. Samples ( $\sim 2 \times 10^7$  *Bb* per lane) were separated by SDS-PAGE on a 12.5% polyacrylamide gel and then either stained with silver or immunoblotted using antisera against Rrp1, GlpD or FlaB (loading control).

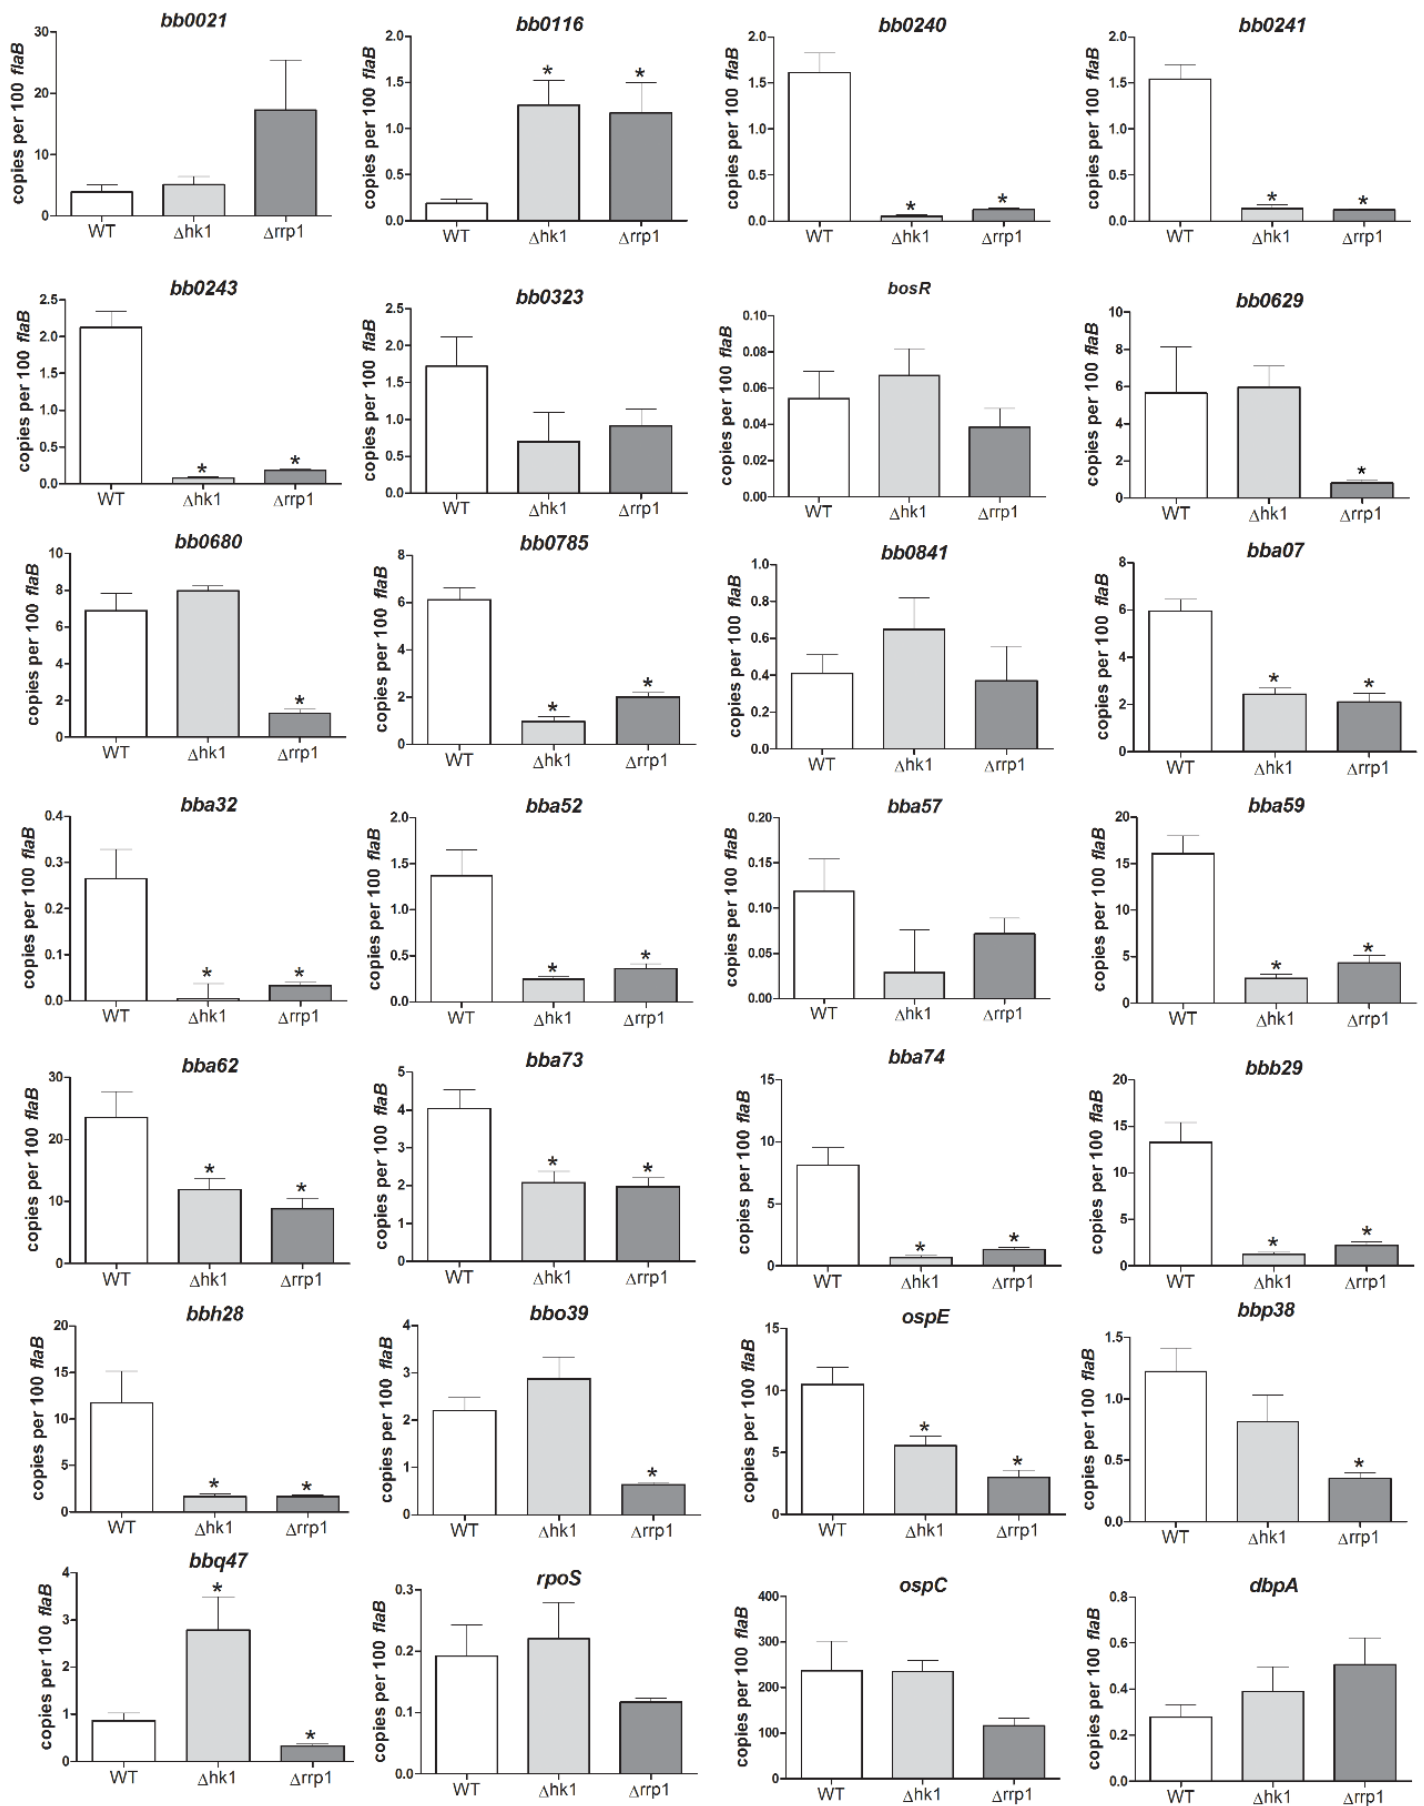

**Figure S3. Validation of RNA-Seq data by qRT-PCR.** qRT-PCR of representative genes selected from comparative RNA-Seq analysis was performed using primers listed in Table S1. Expression profiling was performed using RNA extracted from wild-type *Bb* (Bb1399),  $\Delta hk1$  (Bb1197) and  $\Delta rrp1$  (Bb1520) grown *in vitro* following a temperature-shift from 23°C to 37°C. Values represent the average transcript copy number ( $\pm$  SEM) normalized per 100 copies of *flaB* from at least three biological replicates. Statistical significance was determined using an unpaired *t*-test. \*,  $p \leq 0.05$ .
